# Supplementary material for: Styrene-Lauryl Acrylate Rubber Nanogels as a Plugging Agent for Oil-Based Drilling Fluids with the Function of Improving Emulsion Stability
Source: MDPI journal article supplement (doi:10.3390/gels9010023), 2022-12-28
Supplement: s1 [file s1]

Supplementary Materials

# Styrene-Lauryl Acrylate Rubber Nanogels as a Plugging Agent for Oil-Based Drilling Fluids with the Function of Improving Emulsion Stability

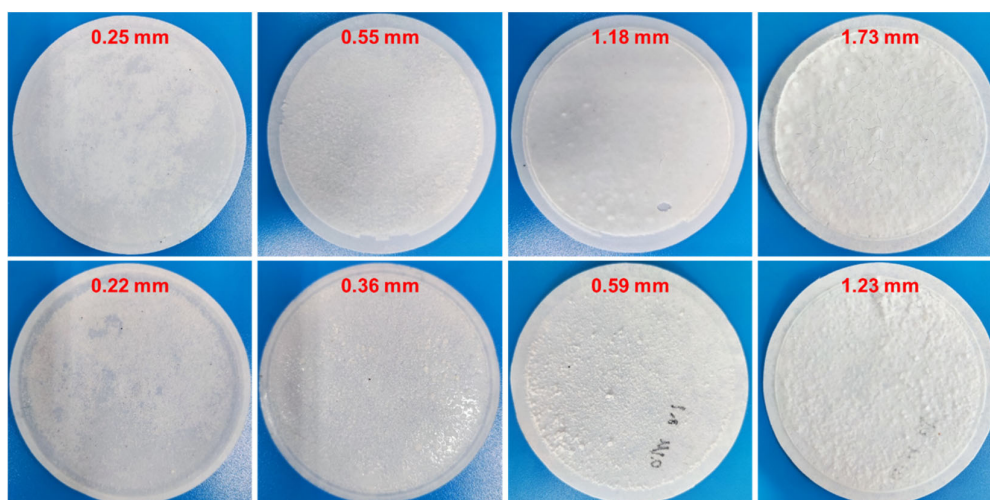

**Figure S1.** Digital images and thickness of filtration cakes of mineral oil (top) and W/O emulsion (bottom). The concentration of PSL from left to right is 0.1 wt%, 0.5 wt%, 1.0 wt%, 3.0 wt%.
